# DEEPDRIM: A DEEP NEURAL NETWORK TO RECONSTRUCT CELL-TYPE-SPECIFIC GENE REGULATORY NETWORK USING SINGLE-CELL RNA-SEQ DATA

JIAXING CHEN, CHINWANG CHEONG, LIANG LAN, XIN ZHOU, JIMING LIU, AIPING LYU,  
WILLIAM K CHEUNG, AND LU ZHANG

**ABSTRACT.** Single-cell RNA sequencing is used to capture cell-specific gene expression, thus allowing reconstruction of gene regulatory networks. The existing algorithms struggle to deal with dropouts and cellular heterogeneity, and commonly require pseudotime-ordered cells. Here, we describe DeepDRIM a supervised deep neural network that represents gene pair joint expression as images and considers the neighborhood context to eliminate the transitive interactions. DeepDRIM yields significantly better performance than the other nine algorithms used on the eight cell lines tested, and can be used to successfully discriminate key functional modules between patients with mild and severe symptoms of coronavirus disease 2019 (COVID-19).

**Keywords.** single-cell RNA sequencing, gene regulatory network, deep neural network, transitive interactions

## BACKGROUND

Reconstruction of gene regulatory networks (GRNs) is critical to understand the mechanisms of synergic gene effects and context-specific transcriptional dynamics. High-throughput technologies such as chromatin immunoprecipitation (ChIP)-chip and ChIP-seq can directly capture the transcription factor (TF) binding sites of targeted genes; however, these techniques are costly and TF-specific, and are therefore unsuitable for use on a whole-genome scale [45]. As a consequential observation, the fact that the co-expression of TFs and their target genes has been adopted to reconstruct GRNs [22, 17, 32, 26] as a means of reverse engineering. In the last two decades, microarrays and bulk RNA sequencing (RNA-seq) have been the two mainstream technologies used to capture gene expression profiles from diverse tissues. Both techniques have been widely applied to identify differentially expressed genes and reconstruct GRNs [43, 25]. However, microarrays and RNA-seq inappropriately assume that gene expression is homogeneous among cells and ignore cellular heterogeneity. Indeed, tissue consists of a diverse range of cell types with distinct GRNs [20] and biological functions [7]. Several studies have sought to reconstruct GRNs using bulk gene expression data [24, 53], but the cell-type-specific GRNs remain largely unexplored. Single-cell RNA sequencing (scRNA-seq) offers an opportunity to capture cell-specific gene expression, which in turn could provide deeper insights into the cellular heterogeneity and cell-type-specific gene activities[51].

---

(Jiaxing Chen, ChinWang Cheong, Liang Lan, Jiming Liu, William K Cheung, Lu Zhang) DEPARTMENT OF COMPUTER SCIENCE, HONG KONG BAPTIST UNIVERSITY, HONG KONG

(Xin Zhou) DEPARTMENT OF BIOMEDICAL ENGINEERING, VANDERBILT UNIVERSITY, USA

(Aiping Lyu) SCHOOL OF CHINESE MEDICINE, HONG KONG BAPTIST UNIVERSITY, HONG KONG

*E-mail addresses:* [jxchen@comp.hkbu.edu.hk](mailto:jxchen@comp.hkbu.edu.hk), [cwcheong@comp.hkbu.edu.hk](mailto:cwcheong@comp.hkbu.edu.hk), [lanliang@comp.hkbu.edu.hk](mailto:lanliang@comp.hkbu.edu.hk), [maizie.zhou@vanderbilt.edu](mailto:maizie.zhou@vanderbilt.edu), [jiming@comp.hkbu.edu.hk](mailto:jiming@comp.hkbu.edu.hk), [aipinglu@hkbu.edu.hk](mailto:aipinglu@hkbu.edu.hk), [william@comp.hkbu.edu.hk](mailto:william@comp.hkbu.edu.hk), [ericluzhang@hkbu.edu.hk](mailto:ericluzhang@hkbu.edu.hk).

33 Most of the available algorithms for GRN reconstruction are designed for bulk gene expression,  
34 and function by resolving two computational challenges. In this context, unique difficulties arise if  
35 scRNA-seq data are adopted instead. First, putative TF-gene interactions are derived by examining  
36 their co-expression. Bulk gene expression data are commonly normalized to a standard Gaussian  
37 distribution, such that the TF-gene correlation can be quantified by methods such as mutual infor-  
38 mation (MI) [37], Pearson correlation coefficient (PCC) [48, 40]. The scRNA-seq gene expression  
39 data are zero-inflated due to the imbalanced transcript sampling. Although it is possible to impute  
40 zero entries before calculating the TF-gene co-expression, this may introduce unpredictable noise  
41 and bias [4], given that most of the imputation algorithms make use of gene-gene co-expression.  
42 Second, the TF-gene pairs with strong co-expression due to transitive interactions (e.g., those  
43 bridged by one or more intermediate genes) should be eliminated (Additional file 1: Figure S1).  
44 Several strategies have been designed to remove these transitive interactions by conditioning on  
45 the other confounding genes; examples include the Gaussian graphical model [3], conditional MI  
46 [62], context-based normalization and edge removal [17], and tree-based ensemble methods [26].  
47 Unfortunately, these algorithms were originally developed to analyze bulk gene expression data,  
48 and are unsuitable for modeling scRNA-seq data [10]. Many algorithms have recently been pro-  
49 posed to cater for the unique characteristics of scRNA-seq for GRN reconstruction. SCODE [38]  
50 infers cell-specific pseudo-time and reconstructs the GRN by solving ordinary differential equations.  
51 PIDC [9] adopts partial information decomposition to break down the TF-gene correlation into re-  
52 dundant, synergistic, and unique effects. SINCERITIES [44] utilizes regularized linear regression  
53 to infer GRNs from time-stamped scRNA-seq data by referring to temporal changes in the gene  
54 expression distributions. GENIE3 [26] is a tree-based ensemble method that was initially developed  
55 for bulk gene expression data. Aibar *et al.* later applied GENIE3 to reconstruct the global GRN  
56 for scRNA-seq and developed AUCell to score the active gene signatures for each cell [1]. Although  
57 these dedicated strategies have been designed to deal with the inherent issues in scRNA-seq data,  
58 none of them yield acceptable results benchmarked by cell-type-specific ChIP-seq data, and some  
59 are even close to random guessing [46].

60 CNNC [60] is a supervised deep neural network that represents the joint expression of a gene  
61 pair as an image and uses convolutional neural networks (CNNs) to predict gene-gene co-expression  
62 from scRNA-seq data. CNNC is robust to dropouts and can infer the interaction causalities using  
63 the information from cell-type-specific ChIP-seq data. We generated synthetic GRNs and their cor-  
64 responding gene expression data (**Methods** and Fig.1) to examine whether CNNC could effectively  
65 distinguish direct and transitive interactions. We noted that a substantial number of the false pos-  
66 itives obtained with CNNC were centered in the gene pairs with strong Pearson correlations (Fig.1  
67 A).

68 Yet considering the image of the target TF-gene pair (primary image) as the only input for the  
69 prediction is insufficient (Fig.1 A). Inspired by an approach named context likelihood of relatedness  
70 (CLR) [17] which have been used to remove the transitive interactions by normalizing the MI of the  
71 target TF-gene pairs to z-scores with their corresponding neighborhood, one can in fact consider  
72 both the target TF-gene pair (primary image) and the images from the gene pairs that share one  
73 gene with the target pair (neighbor images) as the input to the model (Fig.1 and 2).

74 Here we propose DeepDRIM (deep learning-based direct regulatory interaction model), a su-  
75 pervised deep neural network that can reconstruct highly accurate cell-type-specific GRNs from  
76 scRNA-seq data by considering both primary and neighbor images. The rationale and workflow  
77 of DeepDRIM are shown in Fig.2. DeepDRIM first transforms the primary and neighbor images  
78 (Fig.2 A and B) into low-dimensional embeddings using multiple convolutional layers, where their

79 embeddings are then concatenated as the input to a multiple-layer perceptron to calculate the reg-  
80 ulatory confidence scores (Fig.2 C). We compared the effectiveness of DeepDRIM with PCC, MI,  
81 GENIE3, and CNNC for the analysis of eight real scRNA-seq datasets. Our results demonstrated  
82 that DeepDRIM yielded the best performance with respect to both the area under the receiver op-  
83 erating characteristic curve (AUROC) and the area under the precision-recall curve (AUPRC), and  
84 significantly outperformed CNNC (Fig.3 A-D). We also compared DeepDRIM with six effective algo-  
85 rithms that were recently highlighted for reconstructing GRN on scRNA-seq data [46]. The results  
86 demonstrated that DeepDRIM substantially outperformed these algorithms on the five scRNA-seq  
87 datasets with the pseudotime-ordered cells (Fig.3 E-F). Further simulation demonstrated that the  
88 performance of DeepDRIM could be improved by involving more neighbor images, and was robust  
89 to the dropout rate, the cell number, and the size of the training set (Fig.4 A-D).

90 We applied DeepDRIM to the scRNA-seq data collected from the bronchoalveolar lavage fluid of  
91 patients with mild and severe symptoms of coronavirus disease 2019 (COVID-19) [34] to discover  
92 the changes in B cell-specific GRNs. As a result, we observed that a large number of differentially  
93 expressed TFs (DETFs) were “activated” in patients with severe disease (Fig.5 A and B). Further-  
94 more, in patients with severe COVID-19 symptoms, the functions of the target genes were enriched  
95 in apoptosis, response to decreased oxygen levels, and microtubules (Fig.5 C, Fig.6 A and B), all of  
96 which have been previously shown to be associated with COVID-19 [8, 57] and virus infection [18].

97

## RESULTS

### 98 **Effectiveness of neighbor images in removing transitive interactions.**

99 We generated simulated data and attempted to train CNNC using the two types of input, one with  
100 only the primary images and the other with the augmented images (combined primary and neighbor  
101 images, **Methods**). We observed that the overall proportion of false positives and those due to  
102 transitive interactions were remarkably decreased by 40.4% and 55.4%, when considering the neigh-  
103 bor images in the model (Fig.1 B). The rationale behind this observation can be regarded as taking  
104 a “normalization” on the primary image over their neighborhood to alleviate the overestimation  
105 of the strength of interaction. In addition, Fig.1 C and D clearly illustrate that the consideration  
106 of neighbor images will not undermine the power in predicting the direct interactions (e.g., gene  
107 1  $\Rightarrow$  gene 2 in Fig.1 C, and gene 1  $\Rightarrow$  gene 3 in Fig.1 D). In Fig.1 E, gene 2 connects to gene 3  
108 via the indirect edges gene 2  $\Rightarrow$  gene 4  $\Rightarrow$  gene 3. Furthermore, we noticed that the correlations  
109 of both {gene 2, gene 4} ( $|\text{PCC}| = 0.81$ ) and {gene 4, gene 3} ( $|\text{PCC}| = 0.83$ ) were stronger than  
110 the target {gene 2, gene 3} ( $|\text{PCC}| = 0.67$ ), which provided explicit evidence that {gene 2, gene  
111 3} should be marked as a false positive. By considering neighbor images, the model reduce the  
112 predicted confidence score of {gene 2, gene 3} from 0.672 to 0.001, with a similar situation observed  
113 in Fig.1 F. These findings consolidate the importance of considering the local neighborhood in GRN  
114 construction to eliminate false positives due to transitive interactions.

115

### 116 **Overview of DeepDRIM.**

117 DeepDRIM is proposed to reconstruct cell-type-specific GRNs from scRNA-seq data with high pre-  
118 cision and a low false positive rate. Fig.2 illustrates how DeepDRIM can be used to predict the  
119 interaction between gene  $a$  and gene  $b$ . First, DeepDRIM converts the joint gene expression of  
120 gene  $a$  and gene  $b$  into a two-dimensional histogram with 32 by 32 bins (primary image, Fig.2 A),  
121 where the intensity of each bin refers to the number of cells falling within it. Second, DeepDRIM  
122 constructs  $2n + 2$  neighbor images, where the  $2n$  images that refer to the  $n$  genes have top positive  
123 covariance with gene  $a$  ( $a, i$ ) or gene  $b$  ( $b, j$ ) and the 2 images represent the self-images ( $a, a$ ) and

124 ( $b, b$ ). These neighbor images are given to the model to capture the neighborhood context of the  
125 primary image (Fig.2 B), which provides the key information required to distinguish the direct and  
126 transitive interactions. We organize the neighbor images as a tensor rather than an augmented  
127 image to achieve better performance on real data (Additional file 1: Figure S2). Third, two CNNs  
128 are used to process the primary image (Network A) and the neighbor image tensor (32 by 32 by  
129  $2n+2$ ) (Network B), respectively (Fig.2 C, **Methods** and Additional file 1: Figure S3). The neural  
130 networks are trained by known TF-gene interactions taken from publicly available cell-type-specific  
131 ChIP-seq data. Finally, the unknown interactions are predicted by the directed edges with confi-  
132 dence scores (between 0 and 1, Fig.2 D).

133

### 134 **DeepDRIM outperforms the existing algorithms for reconstructing cell-type-specific** 135 **GRNs.**

136 We collected the scRNA-seq datasets from eight cell lines (see **Methods** for the definitions of their  
137 abbreviations) and their corresponding ChIP-seq data from two sources [46, 60] to compare Deep-  
138 DRIM with the existing methods (Table 1) using TF-aware three-fold cross-validation (**Methods**).  
139 We first assessed DeepDRIM with PCC, MI, CNNC, and GENIE3; GENIE3 is one of the best  
140 algorithms for reconstructing GRNs on scRNA-seq [46] and bulk gene expression data [19, 36].

141 Our results demonstrate that DeepDRIM outperformed all four methods in the eight cell types,  
142 and was significantly better than the second best CNNC (Fig.3 A-D, Additional file 1: Table S1  
143 and S2) with respect to both AUROC ( $p$ -values  $\in [1.46E - 3, 7.63E - 6]$ ) and AUPRC ( $p$ -values  
144  $\in [3.42E - 3, 7.63E - 6]$ ). We also showed that DeepDRIM efficiently eliminated false positives  
145 from CNNC in all the eight scRNA-seq datasets (Additional file 1: Figure S4).

146 To further evaluate the effectiveness of DeepDRIM, we collected six algorithms that have been  
147 recently identified with the highest median AUPRC in synthetic networks and Boolean models from  
148 BEELINE [46]. Because some of these algorithms require pseudotime-ordered cells, we selected five  
149 eligible cell types (**Table 1** and found the six algorithms perform differently for each of them (Ad-  
150 ditional file 1: Table S3 and S4). We compared the efficiency of DeepDRIM to these algorithms and  
151 found that DeepDRIM significantly outperformed all six tested algorithms (Fig.3 E-F). DeepDRIM  
152 achieved an average median AUROC of 0.789 and an AUPRC of 0.809 across the five cell types,  
153 while the second best methods only achieved an AUROC of 0.591 (Additional file 1: Table S3) and  
154 an AUPRC of 0.657 (Additional file 1: Table S4). The TF-specific AUROC and AUPRC are shown  
155 in Additional file 2-4.

156

### 157 **DeepDRIM is robust to the quality of scRNA-seq data and the size of the training** 158 **set.**

159 The performance of DeepDRIM can be affected by the quality of scRNA-seq data (the dropout  
160 rate and cell number), the number of involved neighbor images, and the size of the training set. To  
161 evaluate the robustness of DeepDRIM toward these factors, we first selected the scRNA-seq data  
162 from bone marrow-derived macrophages [2] as a template and simulated a series of scRNA-seq data  
163 with a range of parameters (**Methods**). Seven scRNA-seq gene expression datasets were gener-  
164 ated by subsampling the involved cell numbers (from 20 to 4,000 cells), which in turn changed the  
165 resolution of both the primary and neighbor images. We found DeepDRIM to be robust to the  
166 low-resolution images when the number of cells was greater than 100 (Fig.4 A). Next, we imputed  
167 the dropouts in the template using MAGIC [55] and then randomly masked the entries as dropouts  
168 with a range of dropout rates (**Methods**). As shown in Fig.4 B, DeepDRIM demonstrates stable  
169 performance in diverse dropout configurations. Third, we compared the performance of DeepDRIM

170 by varying the number of neighbor images input into the model. As a result, we found that the  
171 more neighbor images that were involved, the better the performance of DeepDRIM (Fig.4 C). In  
172 practice, involving more images would be more computationally costly. In our study, we chose the  
173 top 10 genes with the strongest positive covariance with the target TF or gene; thus involving a  
174 total of 22 neighbor images (if not specified) to balance the two factors. In addition, to evaluate  
175 the effect of the size of the training set, we subsampled 20%, 40%, 60%, 80%, and 100% of the  
176 benchmarked TF-gene pairs for training. Our results revealed that the size of the training set did  
177 not significantly affect the performance of DeepDRIM (Fig.4 D), and almost reached a plateau  
178 when 40% of the training set (including 20,101 TF-gene pairs) was applied.

179

### 180 **Uncovering the variation of B cell-specific GRNs between the patients with mild and** 181 **severe COVID-19.**

182 Patients diagnosed with COVID-19 can have mild or severe acute respiratory distress syndrome,  
183 although the underlying molecular mechanisms responsible for these differences remain unknown.  
184 We performed a case study to elucidate the differences in B cell-specific GRNs between the patients  
185 with mild and severe COVID-19, because the immune responses have been reported to be distinct  
186 between the two situations [6]. To this end, we downloaded scRNA-seq data from the bronchoalve-  
187 olar lavage fluid of six patients with severe symptoms, three patients with mild symptoms, and  
188 three healthy controls [34]. The cell type clusters were obtained by SC3[30] and the one belonged  
189 to B cells was recognized according to the marker genes provided by the original paper [34]. We  
190 extracted validated TF-gene pairs in B cells from the Gene Transcription Regulation Database [58]  
191 as the positive pairs, and combined them with the negative pairs from the same TFs and the gene  
192 expression from the healthy controls as the training set (**Methods**).

193 We observed a clear difference in the GRNs between the two types of patients, and also found  
194 that the target genes of the DETFs were highly correlated with severe acute respiratory syndrome  
195 coronavirus 2 (SARS-CoV-2) infection. First, we observed that DETFs had significantly more  
196 targets ( $p$ -values =  $8.50E - 4$ , Wilcoxon rank sum test) in the patients with severe symptoms, sug-  
197 gesting that these DETFs are more “active” in working with their target genes (**Methods** and Fig.5  
198 A-B). Indeed, the DETFs in the patients with severe symptoms had 1.9 times more targets with  
199 high confidence (confidence scores  $\in [0.967, 1]$ ; the last bar in Fig.5 A) than the patients with mild  
200 symptoms. Next, we focused on the GRNs of DETFs that were unique to the patients with severe  
201 symptoms (Fig.5 C, Fig.6 A and B). The informative target genes were selected based on the follow-  
202 ing two criteria: 1. They should belong to the top 5,000 genes with the highest expression variance  
203 in B cells; and 2. they should be ranked in the top 0.1% of the confidence scores of the patients  
204 with severe symptoms. The eligible genes were annotated with PageRank scores [21] (**Methods**  
205 and Additional file 5) and gene ontology (GO) modules by gene set enrichment analysis (GSEA)  
206 [59](**Methods** and Additional file 6). We identified four GO modules that were associated with  
207 two common symptoms in patients with COVID-19, hypoxemia and lymphopenia (Fig.5 C, Fig.6  
208 A): 1. response to decreased oxygen levels (GO:0036293; *PMAIP1*, *CASP3*, *PSMB3*, *CCNB1*,  
209  $p$ -values= $4.80E - 3$ ); 2. DNA damage response (GO:0030330; *PMAIP1*, *CCNB1*, *RPS27L*,  $p$ -  
210 values= $1.51E - 2$ ); 3. negative regulation of the mitotic cell cycle (GO:0045930; *PSMB3*, *CCNB1*,  
211 *RPS27L*,  $p$ -values= $1.22E - 2$ ); and 4. the intrinsic apoptotic signaling pathway (GO:0097193;  
212 *PMAIP1*, *CASP3*, *RPS27L*,  $p$ -values= $6.29E - 3$ ). The patients were reported to have low oxy-  
213 gen levels or hypoxemia without dyspnea [54, 15], both of which were strongly correlated with  
214 the GO modules “response to decreased oxygen level” and associated with “the intrinsic apoptotic

215 signaling pathway” [50]. Cao et al. [8] reported that genes related to apoptosis could lead to lym-  
216 phopenia in patients with COVID-19. Xiong et al. [57] identified differentially expressed genes in  
217 peripheral blood mononuclear cells of patients with COVID-19 and healthy controls. These genes  
218 were enriched in apoptosis and p53 signaling pathways, both of which could lead to lymphopenia.  
219 Among the genes in these four GO modules, *PMAIP1* [28, 47], *CASP3* [16, 35], *PSMB3* [56],  
220 and *CCNB1* [57] have been reported to be associated with COVID-19 individually (Additional file  
221 1: Table S5).

222 In addition to these main findings, we also noted that there were four genes with top PageRank  
223 scores in the patients with severe symptoms in which unique GRNs could be related to SARS-  
224 CoV-2 infection. Three of them (*DYNLRB1*, *HNRNPU*, and *CCNB1*) belong to GO:0005815  
225 (microtubule organizing center,  $p$ -values= $5.33E-3$ ), which has been reported to be a major facili-  
226 tator of virus infection [18] due to its ability to provide invading pathogens with directed transport  
227 (Fig.6 B). The other gene *DNMT1* is related to *ACE2* [49], which is a known co-receptor for the  
228 SARS-CoV-2 [42].

229

## DISCUSSION

230 Understanding the GRNs is fundamental to the advancement of molecular biology research. Gene  
231 expression profiles from high-throughput sequencing enable computational algorithms to reconstruct  
232 GRNs by examining TF-gene co-expression. Bulk RNA-seq hides the gene activities at single-cell  
233 resolution and will be replaced by scRNA-seq in the near future. However, the gene expression  
234 distribution from scRNA-seq data is not consistent with the assumptions made by most of the  
235 existing methods, which leads to their poor performance in reconstructing GRNs on the scRNA-seq  
236 data [33]. In addition, the widely spread dropouts cause bias in calculating gene-gene co-expression,  
237 even after imputation [12].

238 In this study, we propose DeepDRIM, a supervised deep neural network, to reconstruct GRNs  
239 on scRNA-seq data. Comprehensive evaluation of the performance of DeepDRIM on different  
240 cell types demonstrated that it outperformed the existing algorithms designed for either bulk or  
241 scRNA-seq gene expression data. It is inadvisable to calculate TF-gene interactions on scRNA-  
242 seq data using classical correlation-based methods due to the ubiquitous cellular heterogeneity and  
243 dropouts (Fig.3 A-D). To avoid these limitations, DeepDRIM converts the numerical representation  
244 of TF-gene expression to an image and applies a CNN to embed it into a lower dimension. This  
245 strategy also avoids data normalization and does not presume any distribution. DeepDRIM requires  
246 validated TF-gene pairs for use as a training set to highlight the key areas in the embedding space  
247 that can distinguish the direct interactions and false positives.

248 We trained and tested DeepDRIM using data from the same cell type. As there is sometimes  
249 an insufficient number of cells or validated TF-gene pairs in the training set, we were interested in  
250 training the model using one cell type and then applying it to another. We trained DeepDRIM using  
251 bone marrow-derived macrophages and then applied it to mESC(1) and vice versa (Additional file  
252 1: Figure S5). The results suggest that it is necessary to apply DeepDRIM to matched cell types  
253 in training and test sets; thus, ideas such as transfer learning between cell types are not applicable  
254 to this supervised model.

255 The neighborhood context of the target TF-gene pairs has been widely applied to remove false  
256 positives in GRN reconstruction from bulk gene expression data via z-score normalization [17],  
257 conditional MI [61, 62], and graphical lasso [13]. However, these methods commonly assume that  
258 the gene expression profiles follow a Gaussian distribution, which violates our observation in scRNA-  
259 seq data. Most of the existing algorithms designed for scRNA-seq are unsupervised and require

260 pseudotime-ordered cells, making them inapplicable to bone marrow-derived macrophages, dendritic  
261 cells, and mESC(1), as illustrated in Table 1. DeepDRIM uses the neighborhood context with  
262 respect to neighbor images, and consists of two parts: 1) images from the genes that positively  
263 correlate with the TF or gene from the target pair, and 2) two self-images. In the current model,  
264 we adopted covariance to select the top correlated genes. Although such linear correlation is not  
265 resistant to outliers and dropouts, similar method has shown its effectiveness in discovering gene-  
266 gene co-expression from scRNA-seq data [5]. The two self-images can highlight the variance of  
267 single gene expression.

268 DeepDRIM can not only predict the existence of TF-gene interactions, but also determine their  
269 causalities. This task is not given much attention by the unsupervised algorithms, despite it being  
270 an important consideration if regulatory interactions exist between two TFs. For this particular  
271 task, DeepDRIM does not surpass CNNC, because CNNC only focuses on the primary image  
272 and it is easier to capture the causalities by learning the regulatory directions from the validated  
273 TF-gene pairs. We generated a combined model from DeepDRIM and CNNC (Additional file 1:  
274 Supplementary Notes) and found that it can effectively reduce the false positives without losing  
275 any accuracy in the prediction of causality (Additional file 1: Figure S6).

276 Many studies have been proposed with the aim to identify all of the cell types in the human  
277 tissues, with the ultimate goal of creating a human cell atlas to facilitate interpretation of the  
278 gene activities in individual cell types. DeepDRIM bridges the gap between cell types and gene  
279 functions, and will serve to increase our understanding of the activities of key TFs. We believe that  
280 as the cell-type-specific ChIP-seq data accumulate, DeepDRIM will attract increased attention in  
281 the scRNA-seq research community, and will shed light on drug target discovery and precision  
282 medicine in the future.

## 283 CONCLUSION

284 We propose DeepDRIM, a supervised deep neural network model, to predict GRNs from scRNA-  
285 seq data. DeepDRIM converts the joint expression of a TF-gene pair into a primary image and  
286 considers the neighbor images as the neighborhood context of the primary image to remove false  
287 positives due to transitive interactions. DeepDRIM also utilizes the training set to capture the key  
288 areas in the CNN embeddings that can recognize the TF-gene interactions and causalities. Our  
289 findings demonstrate that DeepDRIM outperforms nine existing algorithms on the eight cell types  
290 tested and is robust to the quality of scRNA-seq data. DeepDRIM can also identify the GRNs of  
291 B cells that are different between patients with mild and severe COVID-19 symptoms. We believe  
292 that DeepDRIM can fill the gaps in reconstructing cell-type-specific GRNs on scRNA-seq data and  
293 contributes to the rapidly growing single-cell research community.

## 294 METHODS

### 295 Representation of gene pair joint expression.

296 The scRNA-seq gene expression profiles are represented as a two-dimensional matrix  $M$ , where  
297  $M_{g,c}$  represents the expression of gene  $g$  in cell  $c$ . We added a small pseudo-count to  $M_{g,c}$  to avoid  
298 empty entries before applying log-normalization:

$$(1) \quad \log M_{g,c} = \log_{10}(M_{g,c} + 10^{-2}).$$

299 The joint histogram of genes  $i$  and  $j$  ( $H_{i,j}$ ) is generated by splitting  $\log M_{i,-}$  and  $\log M_{j,-}$  (“-”:  
300 across all of the cells) into 32 bins, respectively. The value of each bin is derived from the number

301 of cells that falls in the corresponding slot; this value is further log-normalized to avoid extreme  
302 values:

$$(2) \quad \log H_{i,j} = \log_{10}(H_{i,j}/\Sigma(H_{i,j}) + 10^{-4})/4 + 1$$

303 We generated an image ( $I_{i,j}$ ) for genes  $i$  and  $j$  of 32 by 32 pixels, where the intensity of each pixel  
304 is the corresponding value in  $\log H_{i,j}$ . DeepDRIM requires two image sets to predict the direct  
305 interaction between genes  $i$  and  $j$ , namely 1. the primary image  $I_{i,j}$  and 2. the neighbor images. The  
306 neighbor images consist of 1.  $\{I_{i,p_1}, \dots, I_{i,p_n}, I_{j,q_1}, \dots, I_{j,q_n}\}$ , where  $(p_1, p_2, \dots, p_n)$  and  $(q_1, q_2, \dots, q_n)$   
307 are the top  $n$  genes that have strong positive covariance with gene  $i$  and gene  $j$ , respectively; and  
308 2. two self-images  $I_{i,i}$  and  $I_{j,j}$ . The default value of  $n$  was 10 in the experiments.

309

### 310 **Network structure of DeepDRIM.**

311 The network structure of DeepDRIM consists of two components, Network A and Network B, which  
312 process the primary and neighbor images, respectively (Fig.2 C and Additional file 1: Figure S3).  
313 Network A is inspired by VGGnet [52], which contains the stacked convolutional and maxpooling  
314 layers, and uses the rectified linear activation function (*ReLU*) as the activation function. The  
315 structure of Network B is similar to that of Network A, and is a siamese-like neural network, where  
316 the weights are shared among all of the subnetworks. Each image is embedded into a vector of size  
317 512, and a total of  $2n + 3$  images (1 primary image and  $2n + 2$  neighbor images) are converted  
318 into a vector of size  $512 \times (2n + 3)$ . This vector is then condensed by two stacked fully connected  
319 layers, and is processed for binary classification using the sigmoid function. Moreover, DeepDRIM  
320 is trained by mini-batched stochastic gradient descent.

321

### 322 **Simulation of scRNA-seq data to examine the effect of neighbor images.**

323 We simulated 2,500 small datasets, each with 4 genes and 1,000 cells. The ground truth network for  
324 each dataset was represented by a sparse precision matrix  $\Theta$ , where each entry had a 50% chance  
325 of being non-zero and drawn from  $[-1, -0.25] \cup [0.25, 1]$ , or otherwise was assigned zero. We sim-  
326 ulated the gene expression profiles from a multivariate normal distribution  $N(0, \Theta^{-1})$  [14]. Next,  
327 we randomly chose two gene pairs from each dataset, one involving a direct interaction ( $\Theta_{i,j} \neq 0$ )  
328 as a positive case, and the other involving an independent pair ( $\Theta_{i,j} = 0$ ) as a negative case. For  
329 each case, we prepared two types of images, a primary image of 32 by 32 pixels, and an augmented  
330 image by concatenating the primary and six neighbor images (Fig.1 C–F) of 96 by 96 pixels. We  
331 generated two training sets with 5,000 primary and 5,000 augmented images, respectively. These  
332 images were used to train CNNC and the performance was evaluated using the AUROC from the  
333 five-fold cross-validation.

334

### 335 **scRNA-seq data from eight cell lines.**

336 We prepared the real scRNA-seq data from eight cell lines and the corresponding cell-type-specific  
337 ChIP-seq data as the benchmarks (Table 1) to compare DeepDRIM with the existing algorithms for  
338 GRN reconstruction. The eight cell lines comprised bone marrow-derived macrophages [2], dendritic  
339 cells [2], IB10 mouse embryonic stem cells (mESC(1)) [31], human embryonic stem cells (hESC) [11],  
340 and 5G6GR mouse embryonic stem cells (mESC(2)) [23], as well as three mouse hematopoietic stem  
341 cell lines [41] of erythroid lineage (mHSC(E)), granulocyte-macrophage lineage (mHSC(GM)), and  
342 lymphoid lineage (mHSC(L)). All scRNA-seq data were pre-processed and normalized according to  
343 the descriptions in [46, 60]. In practice, GENIE3 is slow if too many genes or cells are involved;  
344 thus, we removed the less informative cells and genes using the strategies described in [1].



345 We extracted the validated TF targets from the ChIP-seq data as positive cases, and the same  
346 number of non-validated targets as negative cases. As training sets that are too large and are  
347 computationally insolvable in terms of generating images, we randomly selected 18 TFs and their  
348 validated targets as positive cases in the training data for hESC, mESC(2), mHSC(E), mHSC(GM),  
349 and mHSC(L) to alleviate the computational burden (Table 1).

350 To improve the performance of the unsupervised methods in Fig.3 E-F, only the overlap between  
351 top-varying 500 genes and the TFs/genes in the training set were selected from the scRNA-seq data  
352 of hESC, mESC(2), mHSC(E), mHSC(GM) and mHSC(L). In cross-validation, We trained CNNC  
353 and DeepDRIM using 2/3 TF-gene pairs in the training set and evaluated their performance on  
354 the overlap between the TFs/genes in the remaining 1/3 test set and top-varying 500 genes. This  
355 could guarantee all the supervised and unsupervised were evaluated on the same TF-gene pairs.

356  
357

### 358 **Comparison of DeepDRIM to existing algorithms for GRN reconstruction.**

359 We compared DeepDRIM with the nine existing algorithms using their default parameters. The  
360 nine algorithms were PCC, MI, CNNC [60], PIDC [9], GENIE3[26], GRNBOOST2 [39], SCODE  
361 [38], PPCOR [29], and SINCERITIES [44]. With the exception of PCC, MI, and CNNC, the other  
362 six methods were performed using the interfaces provided by BEELINE [46]. The AUROC and  
363 AUPRC for each TF were collected to calculate the  $p$ -values between two algorithms using the  
364 Wilcoxon signed rank test. Given that CNNC and DeepDRIM are supervised models, the TFs  
365 from the ChIP-seq data were divided into three independent parts for cross-validation (Additional  
366 file 1: Supplementary Note).

367  
368

### 368 **Simulation of scRNA-seq data to evaluate robustness.**

369 The simulated datasets were transferred from the scRNA-seq of bone marrow-derived macrophages  
370 [2] to preserve the characteristics of scRNA-seq data. We simulated gene expression profiles with  
371 various cell numbers and sizes of training sets via sub-sampling from the total 6,283 cells and 50,254  
372 validated TF-gene pairs from the ChIP-seq data. We applied MAGIC [55] to impute the missing  
373 values in the raw gene expression matrix, and subsequently masked the corresponding entries ac-  
374 cording to the “dropout step” in BoolODE [46]. BoolODE has two parameters,  $drop - probability$   
375 and  $drop - cutoff$ , which are used to control the number of entries to be masked. The entries have  
376 a probability of  $drop - probability$  to be masked if their gene expression values are at the bottom  
377  $drop - cutoff$ . We set the  $drop - probability = 0.3, 0.5$  and the  $drop - cutoff = 0$  to 0.9.

378  
379

### 379 **Generation of validated TF-gene pairs for B cells in patients with COVID-19.**

380 We extracted the ChIP-seq data with the keyword “human B cell” in the Gene Transcription Reg-  
381 ulation Database [58] and determined the TF target genes as those with high confidence peaks  
382 ( $p$ -value  $< 1E - 8$ ) in the promoter regions of these genes. The promoter regions were defined  
383 as the 10 kb upstream and 1 kb downstream regions of the transcript start sites. To generate a  
384 balanced training set, we extracted an equal number of negative pairs by randomly selecting the  
385 non-target genes of the selected TFs.

386  
387

### 387 **Identification of differentially expressed TFs.**

388 We applied SCDE [27] to determine the differentially expressed TFs if the expression fold changes  
389  $> 2$  or  $< 0.5$ , and the  $p$ -values to be  $< 1E - 11$  after multiple testing correction.

390

391 **Gene PageRank score and functional annotation.**

392 We calculated gene PageRank scores using “networkx” [21] (Additional file 5) and applied GSEA  
393 to annotate the enriched GO modules with  $p$ -value < 0.05[59]. The genes were ordered by their  
394 PageRank scores in GSEA analysis.

395 APPENDIX

396 **Funding.**

397 This research is partially supported by Hong Kong Research Grant Council Early Career Scheme  
398 (HKBU 22201419), HKBU Start-up Grant Tier 2(RC-SGT2/19-20/SCI/007), HKBU’s Interdisci-  
399 plinary Research Clusters Matching Scheme (IRCRC/IRCS/17-18/04) and Guangdong Basic and  
400 Applied Basic Research Foundation (2019A1515011046). XZ is partially supported by Vanderbilt  
401 university development funds (*FF\_300033*).

402  
403 **Availability of data and materials.**

404 DeepDRIM is available at <https://github.com/jiaxchen2-c/DeepDRIM>. Gene expression and ChIP-  
405 Seq data of bone marrow-derived macrophages, dendritic cells, mESC(1) are available at <https://github.com/xiaoyey>  
406 Gene expression and ChIP-Seq data of hESC, mESC(2), mHSC(E), mHSC(GM), mHSC(L) are  
407 available at <https://doi.org/10.5281/zenodo.3378975>. Gene expression profiles from the bron-  
408 choalveolar lavage fluid of COVID-19 patients and healthy controls are available at GSE145926.

409  
410 **Authors’ contributions.**

411 LZ, WKC conceived the study; LZ, JXC designed DeepDRIM; JXC implemented the algorithm and  
412 analyzed the results. JXC, CWC conducted the experiments. JXC, LZ, WKC wrote the article.  
413 JML, APL and ZX reviewed the paper. All authors read and approved the final manuscript.

414  
415 **Competing interests.**

416 The authors declare that they have no competing interests.

417  
418 **Acknowledgements.**

419 We also thank Research Grants Council of Hong Kong, Hong Kong Baptist University and HKBU  
420 Research Committee for their kind support of this project.

421  
422 REFERENCES

- 423 1. Sara Aibar, Carmen Bravo González-Blas, Thomas Moerman, Hana Imrichova, Gert Hulselmans, Florian Ram-  
424 bow, Jean-Christophe Marine, Pierre Geurts, Jan Aerts, Joost van den Oord, et al., *Scenic: single-cell regulatory*  
425 *network inference and clustering*, Nature methods **14** (2017), no. 11, 1083.
- 426 2. Amir Alavi, Matthew Ruffalo, Aiyappa Parvangada, Zhilin Huang, and Ziv Bar-Joseph, *A web server for com-*  
427 *parative analysis of single-cell rna-seq data*, Nature communications **9** (2018), no. 1, 1–11.
- 428 3. Genevera I Allen and Zhandong Liu, *A log-linear graphical model for inferring genetic networks from high-*  
429 *throughput sequencing data*, 2012 IEEE International Conference on Bioinformatics and Biomedicine, IEEE,  
430 2012, pp. 1–6.
- 431 4. Tallulah S Andrews and Martin Hemberg, *False signals induced by single-cell imputation*, F1000Research **7**  
432 (2018).
- 433 5. Cédric Arisdakessian, Olivier Poirion, Breck Yunits, Xun Zhu, and Lana X Garmire, *Deepimpute: an accurate,*  
434 *fast, and scalable deep neural network method to impute single-cell rna-seq data*, Genome biology **20** (2019),  
435 no. 1, 1–14.

- 436 6. Prabhu S Arunachalam, Florian Wimmers, Chris Ka Pun Mok, Ranawaka APM Perera, Madeleine Scott, Thomas  
437 Hagan, Natalia Sigal, Yupeng Feng, Laurel Bristow, Owen Tak-Yin Tsang, et al., *Systems biological assessment*  
438 *of immunity to mild versus severe covid-19 infection in humans*, *Science* **369** (2020), no. 6508, 1210–1220.
- 439 7. Norman F Boyd, Lisa J Martin, Michael Bronskill, Martin J Yaffe, Neb Duric, and Salomon Minkin, *Breast*  
440 *tissue composition and susceptibility to breast cancer*, *Journal of the National Cancer Institute* **102** (2010),  
441 no. 16, 1224–1237.
- 442 8. Wei Cao and Taisheng Li, *Covid-19: towards understanding of pathogenesis*, *Cell Research* **30** (2020), no. 5,  
443 367–369.
- 444 9. Thalia E Chan, Michael PH Stumpf, and Ann C Babbie, *Gene regulatory network inference from single-cell data*  
445 *using multivariate information measures*, *Cell systems* **5** (2017), no. 3, 251–267.
- 446 10. Shuonan Chen and Jessica C Mar, *Evaluating methods of inferring gene regulatory networks highlights their lack*  
447 *of performance for single cell gene expression data*, *BMC bioinformatics* **19** (2018), no. 1, 1–21.
- 448 11. Li-Fang Chu, Ning Leng, Jue Zhang, Zhonggang Hou, Daniel Mamott, David T Vereide, Jeea Choi, Christina  
449 Kendzierski, Ron Stewart, and James A Thomson, *Single-cell rna-seq reveals novel regulators of human embry-*  
450 *onic stem cell differentiation to definitive endoderm*, *Genome biology* **17** (2016), no. 1, 173.
- 451 12. Megan Crow and Jesse Gillis, *Co-expression in single-cell analysis: Saving grace or original sin?*, *Trends in*  
452 *Genetics* **34** (2018), no. 11, 823–831.
- 453 13. Patrick Danaher, Pei Wang, and Daniela M Witten, *The joint graphical lasso for inverse covariance estimation*  
454 *across multiple classes*, *Journal of the Royal Statistical Society. Series B, Statistical methodology* **76** (2014),  
455 no. 2, 373.
- 456 14. Weiping Deng, Kui Zhang, Sanzhen Liu, Patrick X Zhao, Shizhong Xu, and Hairong Wei, *Jrmgrn: joint*  
457 *reconstruction of multiple gene regulatory networks with common hub genes using data from multiple tissues or*  
458 *conditions*, *Bioinformatics* **34** (2018), no. 20, 3470–3478.
- 459 15. Sebastiaan Dhont, Eric Derom, Eva Van Braeckel, Pieter Depuydt, and Bart N Lambrecht, *The pathophysiology*  
460 *of ‘happy’hypoxemia in covid-19*, *Respiratory Research* **21** (2020), no. 1, 1–9.
- 461 16. Fuyu Duan, Liyan Guo, Liuliu Yang, Yuling Han, Abhimanyu Thakur, Benjamin E Nilsson-Payant, Pengfei  
462 Wang, Zhao Zhang, Chui Yan Ma, Xiaoya Zhou, et al., *Modeling covid-19 with human pluripotent stem cell-*  
463 *derived cells reveals synergistic effects of anti-inflammatory macrophages with ace2 inhibition against sars-cov-2*,  
464 (2020).
- 465 17. Jeremiah J Faith, Boris Hayete, Joshua T Thaden, Ilaria Mogno, Jamey Wierzbowski, Guillaume Cottarel,  
466 Simon Kasif, James J Collins, and Timothy S Gardner, *Large-scale mapping and validation of escherichia coli*  
467 *transcriptional regulation from a compendium of expression profiles*, *PLoS biology* **5** (2007), no. 1, e8.
- 468 18. Urs F Greber and Michael Way, *A superhighway to virus infection*, *Cell* **124** (2006), no. 4, 741–754.
- 469 19. Alex Greenfield, Aviv Madar, Harry Ostrer, and Richard Bonneau, *Dream4: Combining genetic and dynamic*  
470 *information to identify biological networks and dynamical models*, *PLoS one* **5** (2010), no. 10, e13397.
- 471 20. Alexandra Grubman, Gabriel Chew, John F Ouyang, Guizhi Sun, Xin Yi Choo, Catriona McLean, Rebecca K  
472 Simmons, Sam Buckberry, Dulce B Vargas-Landin, Daniel Poppe, et al., *A single-cell atlas of entorhinal cortex*  
473 *from individuals with alzheimer’s disease reveals cell-type-specific gene expression regulation*, *Nature neuroscience*  
474 **22** (2019), no. 12, 2087–2097.
- 475 21. Aric Hagberg, Pieter Swart, and Daniel S Chult, *Exploring network structure, dynamics, and function using*  
476 *networkx*, Tech. report, Los Alamos National Lab.(LANL), Los Alamos, NM (United States), 2008.
- 477 22. Anne-Claire Haury, Fantine Mordelet, Paola Vera-Licona, and Jean-Philippe Vert, *Tigress: trustful inference of*  
478 *gene regulation using stability selection*, *BMC systems biology* **6** (2012), no. 1, 145.
- 479 23. Tetsutaro Hayashi, Haruka Ozaki, Yohei Sasagawa, Mana Umeda, Hiroki Danno, and Itoshi Nikaido, *Single-cell*  
480 *full-length total rna sequencing uncovers dynamics of recursive splicing and enhancer rnas*, *Nature communica-*  
481 *tions* **9** (2018), no. 1, 1–16.
- 482 24. Ji Huang, Juefei Zheng, Hui Yuan, and Karen McGinnis, *Distinct tissue-specific transcriptional regulation re-*  
483 *vealed by gene regulatory networks in maize*, *BMC plant biology* **18** (2018), no. 1, 1–14.
- 484 25. Sui Huang, Gabriel Eichler, Yaneer Bar-Yam, and Donald E Ingber, *Cell fates as high-dimensional attractor*  
485 *states of a complex gene regulatory network*, *Physical review letters* **94** (2005), no. 12, 128701.
- 486 26. Alexandre Irrthum, Louis Wehenkel, Pierre Geurts, et al., *Inferring regulatory networks from expression data*  
487 *using tree-based methods*, *PLoS one* **5** (2010), no. 9, e12776.
- 488 27. Peter V Kharchenko, Lev Silberstein, and David T Scadden, *Bayesian approach to single-cell differential expres-*  
489 *sion analysis*, *Nature methods* **11** (2014), no. 7, 740–742.

- 490 28. Maroun Khoury, Jimena Cuenca, Fernanda F Cruz, Fernando E Figueroa, Patricia RM Rocco, and Daniel J  
491 Weiss, *Current status of cell-based therapies for respiratory virus infections: applicability to covid-19*, European  
492 Respiratory Journal **55** (2020), no. 6.
- 493 29. Seongho Kim, *ppcor: an r package for a fast calculation to semi-partial correlation coefficients*, Communications  
494 for statistical applications and methods **22** (2015), no. 6, 665.
- 495 30. Vladimir Yu Kiselev, Kristina Kirschner, Michael T Schaub, Tallulah Andrews, Andrew Yiu, Tamir Chandra,  
496 Kedar N Natarajan, Wolf Reik, Mauricio Barahona, Anthony R Green, et al., *Sc3: consensus clustering of*  
497 *single-cell rna-seq data*, Nature methods **14** (2017), no. 5, 483.
- 498 31. Allon M Klein, Linas Mazutis, Ilke Akartuna, Naren Tallapragada, Adrian Veres, Victor Li, Leonid Peshkin,  
499 David A Weitz, and Marc W Kirschner, *Droplet barcoding for single-cell transcriptomics applied to embryonic*  
500 *stem cells*, Cell **161** (2015), no. 5, 1187–1201.
- 501 32. Robert Küffner, Tobias Petri, Pegah Tavakkolkhah, Lukas Windhager, and Ralf Zimmer, *Inferring gene regula-*  
502 *tory networks by anova*, Bioinformatics **28** (2012), no. 10, 1376–1382.
- 503 33. Wei Vivian Li and Jingyi Jessica Li, *An accurate and robust imputation method scimpute for single-cell rna-seq*  
504 *data*, Nature communications **9** (2018), no. 1, 997.
- 505 34. Mingfeng Liao, Yang Liu, Jing Yuan, Yanling Wen, Gang Xu, Juanjuan Zhao, Lin Cheng, Jinxiu Li, Xin Wang,  
506 Fuxiang Wang, et al., *Single-cell landscape of bronchoalveolar immune cells in patients with covid-19*, Nature  
507 medicine (2020), 1–3.
- 508 35. Xiao-Ying Ling, Jia-Lei Tao, Xun Sun, and Bin Yuan, *Exploring material basis and mechanism of lianhua*  
509 *qingwen prescription against coronavirus based on network pharmacology*, Chin. Trad. Herbal Drugs (2020),  
510 1723–1730.
- 511 36. Daniel Marbach, James C Costello, Robert Küffner, Nicole M Vega, Robert J Prill, Diogo M Camacho, Kyle R  
512 Allison, Andrej Aderhold, Richard Bonneau, Yukun Chen, et al., *Wisdom of crowds for robust gene network*  
513 *inference*, Nature methods **9** (2012), no. 8, 796.
- 514 37. Adam A Margolin, Ilya Nemenman, Katia Basso, Chris Wiggins, Gustavo Stolovitzky, Riccardo Dalla Favera,  
515 and Andrea Califano, *Aracne: an algorithm for the reconstruction of gene regulatory networks in a mammalian*  
516 *cellular context*, BMC bioinformatics, vol. 7, BioMed Central, 2006, p. S7.
- 517 38. Hirotaka Matsumoto, Hisanori Kiryu, Chikara Furusawa, Minoru SH Ko, Shigeru BH Ko, Norio Gouda, Tetsutaro  
518 Hayashi, and Itoshi Nikaido, *Scode: an efficient regulatory network inference algorithm from single-cell rna-seq*  
519 *during differentiation*, Bioinformatics **33** (2017), no. 15, 2314–2321.
- 520 39. Thomas Moerman, Sara Aibar Santos, Carmen Bravo González-Blas, Jaak Simm, Yves Moreau, Jan Aerts, and  
521 Stein Aerts, *Grnboost2 and arboreto: efficient and scalable inference of gene regulatory networks*, Bioinformatics  
522 **35** (2019), no. 12, 2159–2161.
- 523 40. Brian Munsky, Gregor Neuert, and Alexander Van Oudenaarden, *Using gene expression noise to understand*  
524 *gene regulation*, Science **336** (2012), no. 6078, 183–187.
- 525 41. Sonia Nestorowa, Fiona K Hamey, Blanca Pijuan Sala, Evangelia Diamanti, Mairi Shepherd, Elisa Laurenti,  
526 Nicola K Wilson, David G Kent, and Berthold Göttgens, *A single-cell resolution map of mouse hematopoietic*  
527 *stem and progenitor cell differentiation*, Blood, The Journal of the American Society of Hematology **128** (2016),  
528 no. 8, e20–e31.
- 529 42. Wentao Ni, Xiuwen Yang, Deqing Yang, Jing Bao, Ran Li, Yongjiu Xiao, Chang Hou, Haibin Wang, Jie Liu,  
530 Donghong Yang, et al., *Role of angiotensin-converting enzyme 2 (ace2) in covid-19*, Critical Care **24** (2020),  
531 no. 1, 1–10.
- 532 43. Alicia Oshlack, Mark D Robinson, and Matthew D Young, *From rna-seq reads to differential expression results*,  
533 Genome biology **11** (2010), no. 12, 220.
- 534 44. Nan Papili Gao, SM Minhaz Ud-Dean, Olivier Gandrillon, and Rudyanto Gunawan, *Sincerities: inferring gene*  
535 *regulatory networks from time-stamped single cell transcriptional expression profiles*, Bioinformatics **34** (2018),  
536 no. 2, 258–266.
- 537 45. Peter J Park, *Chip-seq: advantages and challenges of a maturing technology*, Nature reviews genetics **10** (2009),  
538 no. 10, 669–680.
- 539 46. Aditya Pratapa, Amogh P Jalihal, Jeffrey N Law, Aditya Bharadwaj, and TM Murali, *Benchmarking algorithms*  
540 *for gene regulatory network inference from single-cell transcriptomic data*, Nature Methods **17** (2020), no. 2,  
541 147–154.
- 542 47. Shitao Rao, Alexandria Lau, and Hon-Cheong So, *Exploring diseases/traits and blood proteins causally related to*  
543 *expression of ace2, the putative receptor of sars-cov-2: A mendelian randomization analysis highlights tentative*  
544 *relevance of diabetes-related traits*, Diabetes Care (2020).

- 545 48. Faridah Hani Mohamed Salleh, Shereena Mohd Arif, Suhaila Zainudin, and Mohd Firdaus-Raih, *Reconstructing*  
546 *gene regulatory networks from knock-out data using gaussian noise model and pearson correlation coefficient*,  
547 *Computational biology and chemistry* **59** (2015), 3–14.
- 548 49. Amr H Sawalha, Ming Zhao, Patrick Coit, and Qianjin Lu, *Epigenetic dysregulation of ace2 and interferon-*  
549 *regulated genes might suggest increased covid-19 susceptibility and severity in lupus patients*, *Clinical Immunology*  
550 (2020), 108410.
- 551 50. Ataman Sendoel and Michael O Hengartner, *Apoptotic cell death under hypoxia*, *Physiology* **29** (2014), no. 3,  
552 168–176.
- 553 51. Stefan Siebert, Jeffrey A Farrell, Jack F Cazet, Yashodara Abeykoon, Abby S Primack, Christine E Schnitzler,  
554 and Celina E Juliano, *Stem cell differentiation trajectories in hydra resolved at single-cell resolution*, *Science*  
555 **365** (2019), no. 6451, eaav9314.
- 556 52. Karen Simonyan and Andrew Zisserman, *Very deep convolutional networks for large-scale image recognition*,  
557 arXiv preprint arXiv:1409.1556 (2014).
- 558 53. Husain A Talukdar, Hassan Foroughi Asl, Rajeev K Jain, Raili Ermel, Arno Ruusalepp, Oscar Franzén, Brian A  
559 Kidd, Ben Readhead, Chiara Giannarelli, Jason C Kovacic, et al., *Cross-tissue regulatory gene networks in*  
560 *coronary artery disease*, *Cell systems* **2** (2016), no. 3, 196–208.
- 561 54. Martin J Tobin, Franco Laghi, and Amal Jubran, *Why covid-19 silent hypoxemia is baffling to physicians*,  
562 *American Journal of Respiratory and Critical Care Medicine* **202** (2020), no. 3, 356–360.
- 563 55. David Van Dijk, Roshan Sharma, Juozas Nainys, Kristina Yim, Pooja Kathail, Ambrose J Carr, Cassandra  
564 Burdziak, Kevin R Moon, Christine L Chaffer, Diwakar Pattabiraman, et al., *Recovering gene interactions from*  
565 *single-cell data using data diffusion*, *Cell* **174** (2018), no. 3, 716–729.
- 566 56. Els Wauters, Pierre Van Mol, Abhishek D Garg, Sander Jansen, Yannick Van Herck, Lore Vanderbeke, Ayse  
567 Bassez, Bram Boeckx, Bert Malengier-Devlies, Anna Timmerman, et al., *Discriminating mild from critical*  
568 *covid-19 by innate and adaptive immune single-cell profiling of bronchoalveolar lavages*, *BioRxiv* (2020).
- 569 57. Yong Xiong, Yuan Liu, Liu Cao, Dehe Wang, Ming Guo, Ao Jiang, Dong Guo, Wenjia Hu, Jiayi Yang, Zhidong  
570 Tang, et al., *Transcriptomic characteristics of bronchoalveolar lavage fluid and peripheral blood mononuclear*  
571 *cells in covid-19 patients*, *Emerging microbes & infections* **9** (2020), no. 1, 761–770.
- 572 58. Ivan Yevshin, Ruslan Sharipov, Tagir Valeev, Alexander Kel, and Fedor Kolpakov, *Gtrd: a database of tran-*  
573 *scription factor binding sites identified by chip-seq experiments*, *Nucleic acids research* (2016), gkw951.
- 574 59. Guangchuang Yu, Li-Gen Wang, Yanyan Han, and Qing-Yu He, *clusterprofiler: an r package for comparing*  
575 *biological themes among gene clusters*, *Omics: a journal of integrative biology* **16** (2012), no. 5, 284–287.
- 576 60. Ye Yuan and Ziv Bar-Joseph, *Deep learning for inferring gene relationships from single-cell expression data*,  
577 *Proceedings of the National Academy of Sciences* **116** (2019), no. 52, 27151–27158.
- 578 61. Xiujun Zhang, Juan Zhao, Jin-Kao Hao, Xing-Ming Zhao, and Luonan Chen, *Conditional mutual inclusive*  
579 *information enables accurate quantification of associations in gene regulatory networks*, *Nucleic acids research*  
580 **43** (2015), no. 5, e31–e31.
- 581 62. Xiujun Zhang, Xing-Ming Zhao, Kun He, Le Lu, Yongwei Cao, Jingdong Liu, Jin-Kao Hao, Zhi-Ping Liu, and  
582 Luonan Chen, *Inferring gene regulatory networks from gene expression data by path consistency algorithm based*  
583 *on conditional mutual information*, *Bioinformatics* **28** (2012), no. 1, 98–104.

584

FIGURES

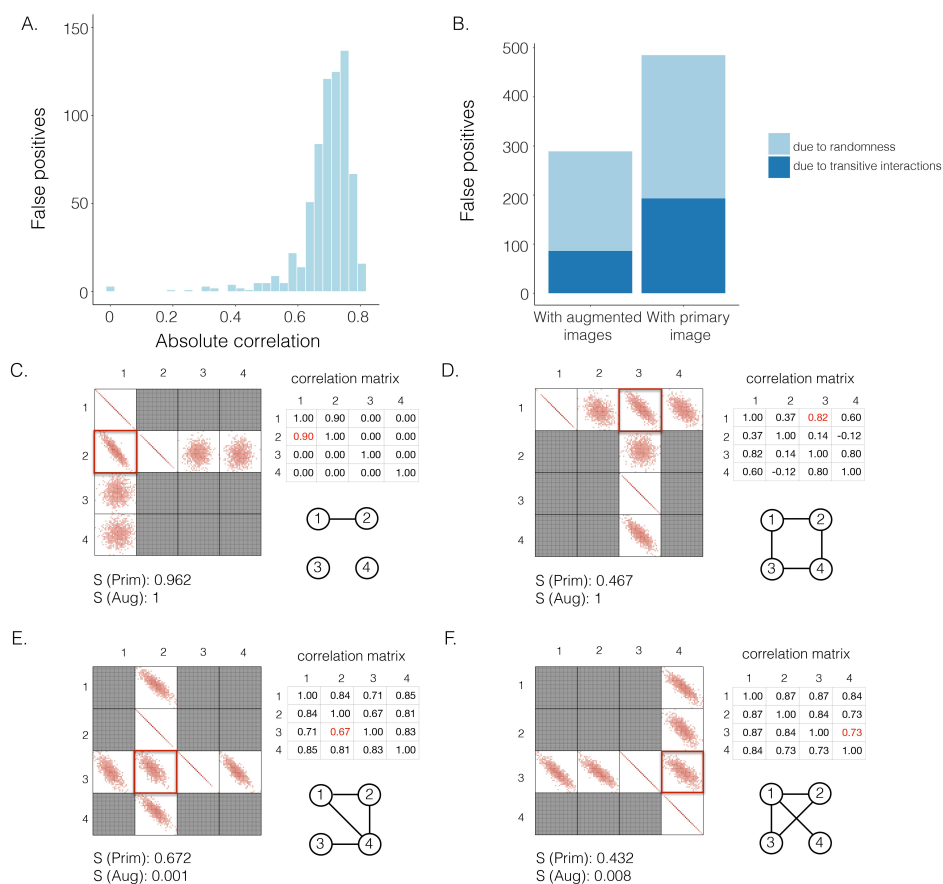

FIG. 1. The effectiveness of neighbor images in reconstructing GRN on the simulated data. **A.** The distribution of false positives from CNNC. **B.** The false positives of the two models with primary (*Prim*) and augmented (*Aug*) images as inputs due to randomness and transitive interactions. **C** and **D.** Two examples that demonstrate both of the models can correctly identify the direct interactions (**C**:  $g_1 \Rightarrow g_2$ , **D**:  $g_1 \Rightarrow g_3$ ). **E** and **F.** Two examples that demonstrate the model trained by augmented images can recognize and eliminate the false positives caused by the transitive edges (**E**:  $g_2 \Rightarrow g_3$ , **F**:  $g_3 \Rightarrow g_4$ ). The primary images are highlighted in the red squares, and  $S(\cdot)$  denotes the confidence scores from the models with primary ( $S(Prim)$ ) or augmented images ( $S(Aug)$ ) as input. The correlation matrices and absolute correlation are calculated by Pearson correlation coefficient.

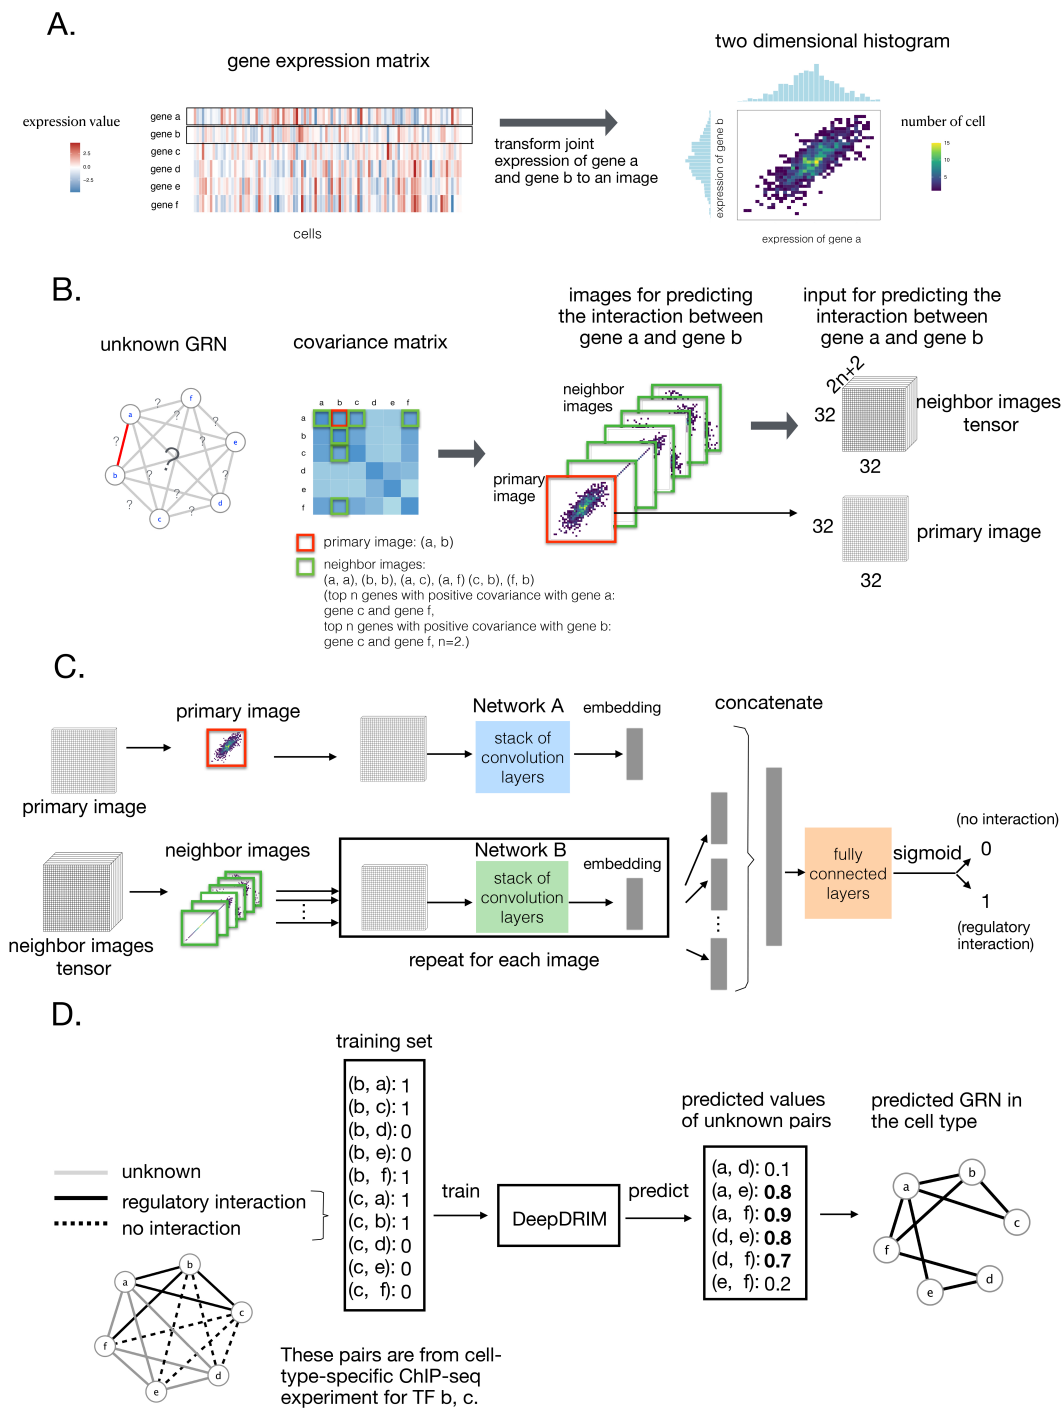

partially known GRN in the cell type

FIG. 2. Overview of DeepDRIM. **A.** Representation of the joint gene expression of gene a and gene b as a primary image. **B.** The  $2n + 2$  neighbor images are generated from the genes with strong positive covariance with gene a or gene b. **C.** The network architecture of DeepDRIM, including Network A and Network B, which are two stacked convolutional embedding structures designed to process the primary and neighbor images, respectively. Detailed network structures are shown in Additional file 1: Figure S3. **D.** An example for the prediction of a cell-type-specific GRN using DeepDRIM.

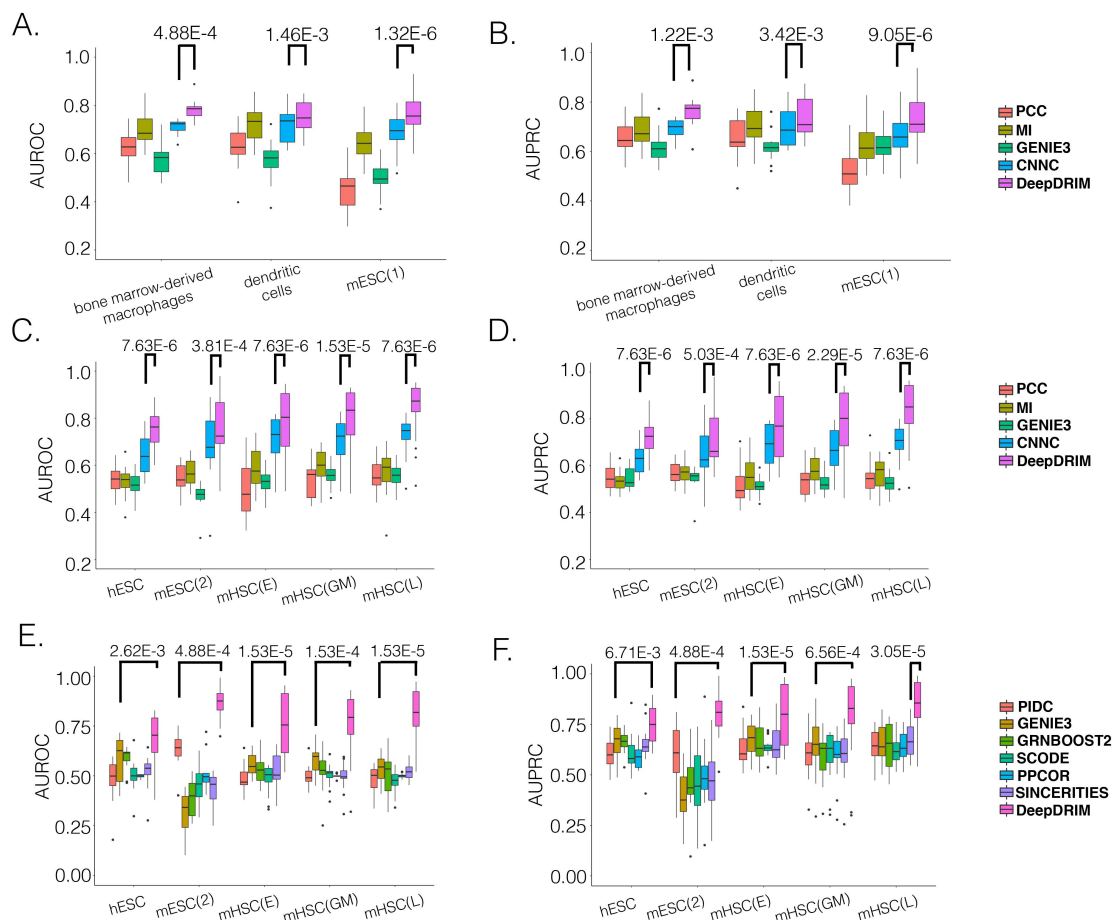

FIG. 3. Comparison of DeepDRIM with the existing algorithms for GRN reconstruction on the scRNA-seq data from eight cell lines. **A**, **B**, **C** and **D**:  $p$ -values were calculated between CNNC and DeepDRIM. **E** and **F**: The  $p$ -values were calculated between DeepDRIM (the best performer) and the second best algorithms (Additional file 1: Table S3 and S4).



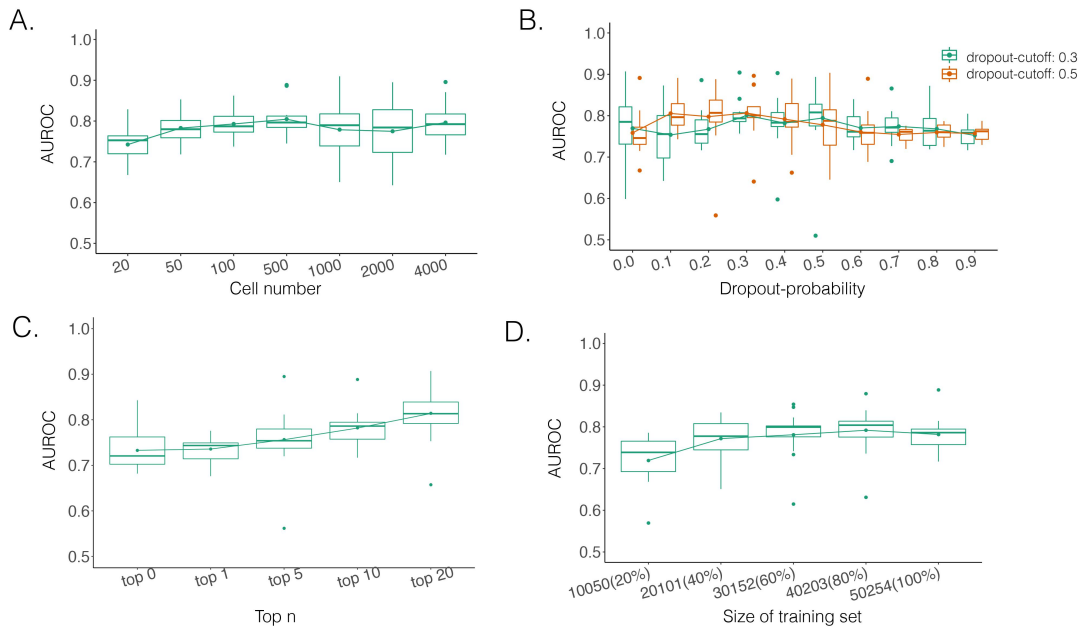

FIG. 4. Performance of DeepDRIM with a wide range of the qualities of scRNA-seq data (cell numbers and dropout rates), the number of involved neighbor images, and the size of training set.

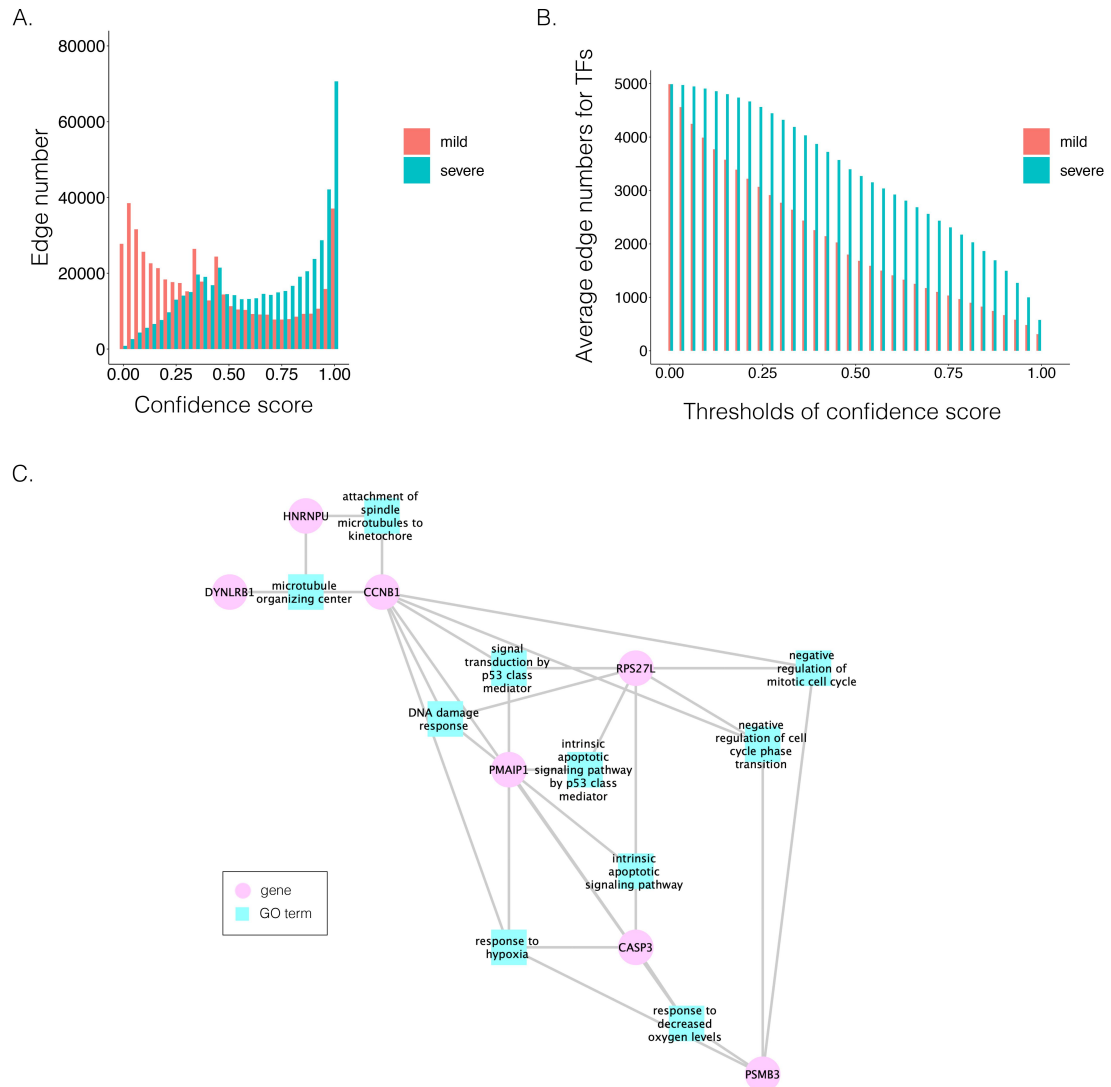

FIG. 5. Comparison of B cell-specific gene regulatory networks (GRNs) for patients with mild and severe COVID-19. **A.** The distribution of the confidence scores of the differentially expressed transcription factors and their target genes. **B.** The average target numbers of DETFs given different confidence score thresholds. **C.** The GO modules and the involved key transcription factors/genes related to COVID-19 symptoms.

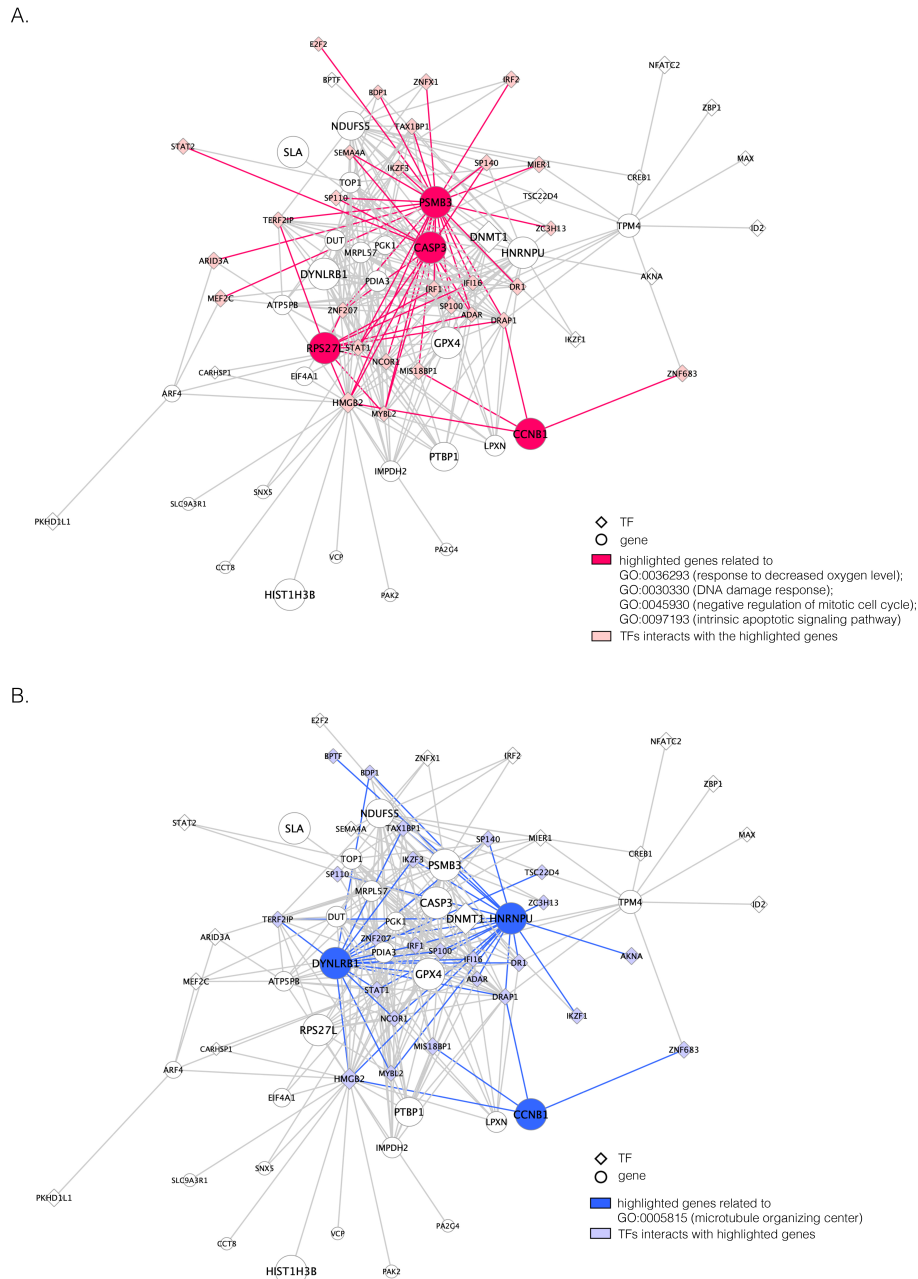

FIG. 6. The unique GRNs of DETFs from the patients with severe COVID-19. **A.** GRNs related to: response to a decreased oxygen level (GO:0036293); DNA damage response (GO:0030330); negative regulation of the mitotic cell cycle (GO:0045930); and the intrinsic apoptotic signaling pathway (GO:0097193). **B.** GRNs related to the microtubule organizing center (GO:0005815). The edges are shown if their absolute Pearson correlation coefficients larger than 0.4. DETFs: differentially expressed transcription factors.

TABLES

TABLE 1. scRNA-seq datasets from the eight cell lines used in the experiments.

| Cell lines                          | Genes  | Cells | Size of training set | Number of TFs | Pseudo-time |
|-------------------------------------|--------|-------|----------------------|---------------|-------------|
| Bone marrow-derived macrophages [2] | 20,463 | 6,283 | 50,254               | 13            | N           |
| Dendritic cells [2]                 | 20,463 | 4,126 | 28,046               | 16            | N           |
| mESC(1) [31]                        | 24,175 | 2,717 | 154,931              | 38            | N           |
| hESC [11]                           | 17,735 | 758   | 100,720              | 18            | Y           |
| mESC(2) [23]                        | 18,385 | 421   | 94,332               | 18            | Y           |
| mHSC(E) [41]                        | 4,762  | 1,071 | 49,114               | 18            | Y           |
| mHSC(GM) [41]                       | 4,762  | 889   | 43,712               | 18            | Y           |
| mHSC(L) [41]                        | 4,762  | 847   | 48,884               | 18            | Y           |

mESC(1): IB10 mouse embryonic stem cells, hESC: human embryonic stem cells, mESC(2): 5G6GR mouse embryonic stem cells, mHSC(E), mHSC(GM) and mHSC(L): three mouse hematopoietic stem cell lines of erythroid lineage, granulocyte-macrophage lineage, and lymphoid lineage.

586

#### ADDITIONAL FILES

587 Additional file 1 — Supplementary Note, Supplementary Figures and Supplementary Tables.  
588 Additional file 2 — AUROCs and AUPRCs of PCC, MI, GENIE3, CNNC, and DeepDRIM for each  
589 TF on bone marrow-derived macrophages, dendritic cells, and mESC(1).  
590 Additional file 3 — AUROCs and AUPRCs of PCC, MI, GENIE3, CNNC, and DeepDRIM for each  
591 TF on hESC, mESC(2), mHSC(E), mHSC(GM), and mHSC(L).  
592 Additional file 4 — AUROCs and AUPRCs of PIDC, GENIE3, GRNBOOST2, SCODE, PPCOR,  
593 SINCERITIES, and DeepDRIM for each TF on hESC, mESC(2), mHSC(E), mHSC(GM), and  
594 mHSC(L).  
595 Additional file 5 — PageRank scores, degree and betweenness of the genes in the GRNs from the  
596 patients with severe COVID-19.  
597 Additional file 6 — GO annotation for the genes in the GRNS from the patients with severe  
598 COVID-19.
